# Supplementary material
Source: publisher figshare collection journal article supplement (https://acs.figshare.com/ndownloader/files/4067200)
Supplement: Supplementary file 1 [file 4067200]

**Supporting information: Atomically Abrupt Silicon-Germanium Axial  
Heterostructure Nanowires Synthesized in a Solvent Vapor Growth System**

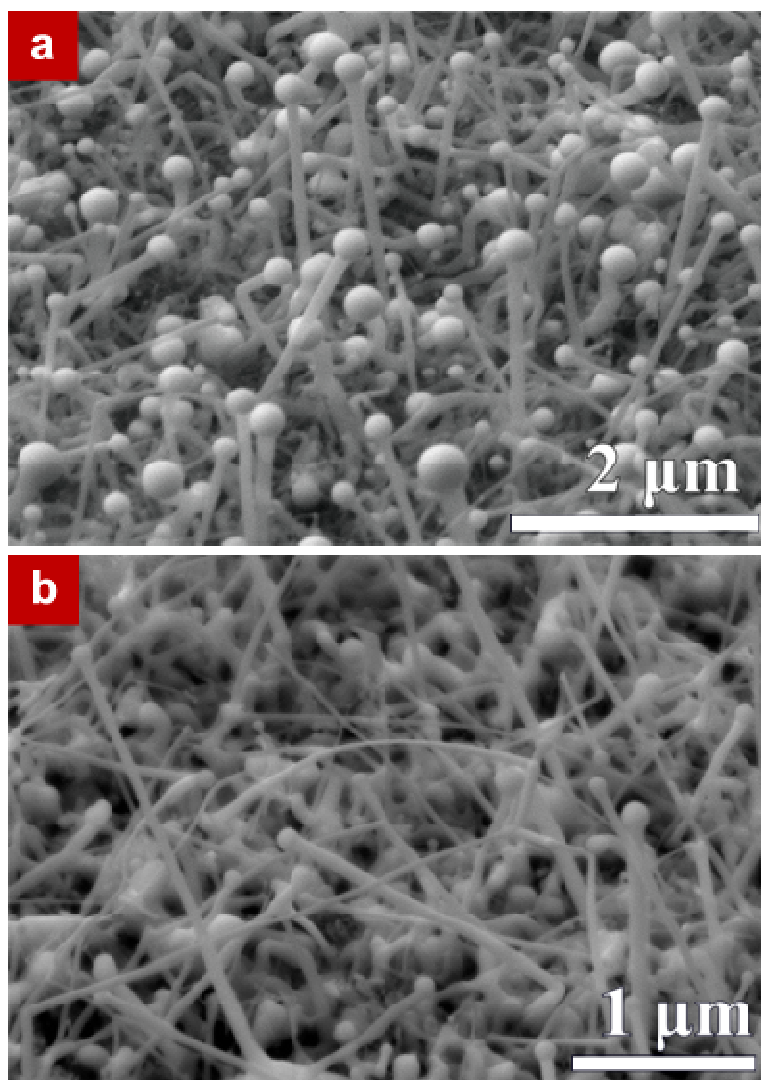

**Figure S1:** Low magnification SEM image showing seed/NW diameters for a) Sn seeded Si NWs and b) Sn seeded Ge NWs synthesized in the SVG system.

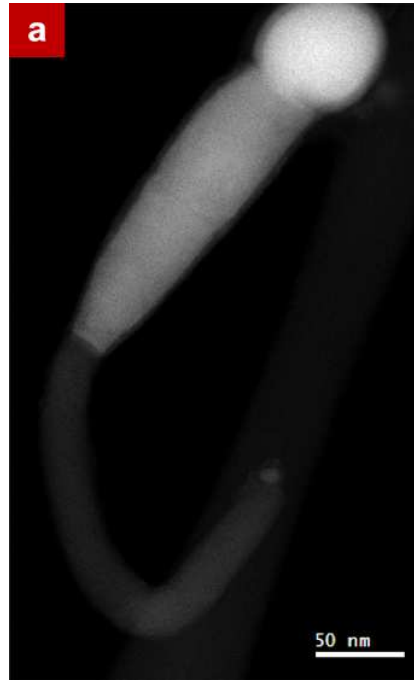

**Figure S2:** Low magnification HAADF image of Sn catalyzed Ge/Si NW

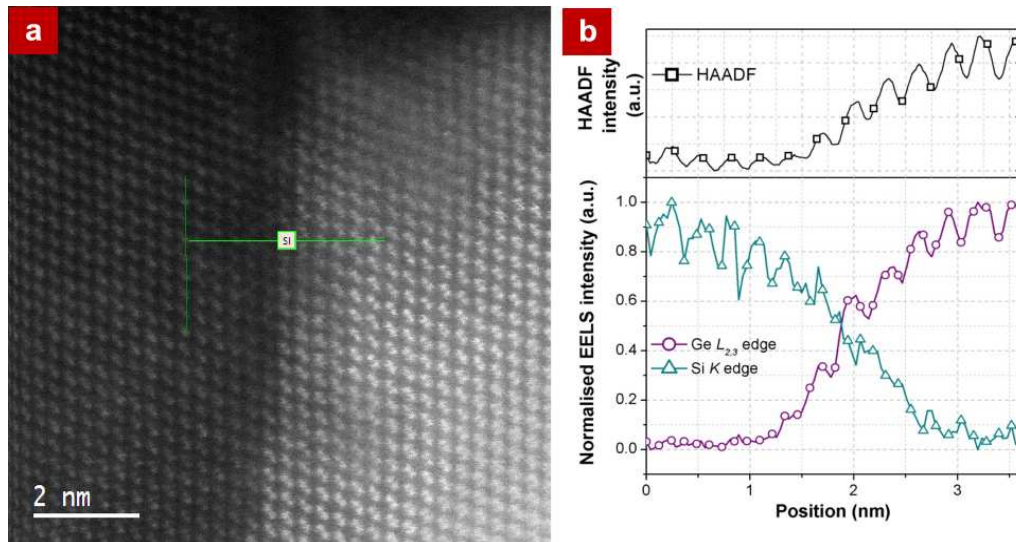

**Figure S3:** a) HAADF image of the Si/Ge interface at the periphery of the NW presented in Figure 2 of the main paper. The line indicates the direction of the EELS line scan presented in b) which shows a much sharper interfacial abruptness than that noted for the defected middle section of the NW.
